# Supplementary material for: High expression of F2RL3 correlates with aggressive features and poor survival in clear cell renal cell carcinoma
Source: PubMed Central journal article supplement — J Cancer. 2018 Sep 8;9(18):3400–6. doi: 10.7150/jca.23923 (PMC6160688; doi:10.7150/jca.23923), 2018-09-08
Supplement: jcav09p3400s1.pdf [file jcav09p3400s1.pdf]

**Table S1.** Median PFS and OS in relation to *F2RL3* expression levels in patients with ccRCC

| <i>F2RL3</i><br>expression<br>level | Median PFS           |                   |                         |           | Median OS            |                   |                         |           |
|-------------------------------------|----------------------|-------------------|-------------------------|-----------|----------------------|-------------------|-------------------------|-----------|
|                                     | Estimate<br>(months) | Standard<br>Error | 95% Confidence Interval |           | Estimate<br>(months) | Standard<br>Error | 95% Confidence Interval |           |
|                                     |                      |                   | Lower                   | Upper     |                      |                   | Lower                   | Upper     |
| Low                                 | 90                   | 17.128523         | 56.428096               | 123.5719  | -                    | -                 | -                       | -         |
| Middle                              | 74                   | 9.6932918         | 55.001148               | 92.998852 | 100                  | 8.9822826         | 82.394726               | 117.60527 |
| High                                | 37                   | 7.0238465         | 23.233261               | 50.766739 | 65                   | 10.247665         | 44.914577               | 85.085423 |
| Overall                             | 60                   | 5.8164984         | 48.599663               | 71.400337 | 99                   | 7.5599828         | 84.182434               | 113.81757 |

Abbreviations: PFS: progression-free survival; OS: overall survival; ccRCC: clear cell renal cell carcinoma; F2RL3: coagulation factor II receptor-like 3 gene;
